# Supplementary material for: Development of a bedside viable ultrasound protocol to quantify appendicular lean tissue mass
Source: PubMed Central journal article supplement — J Cachexia Sarcopenia Muscle. 2017 Jul 19;8(5):713–26. doi: 10.1002/jcsm.12213 (PMC5659058; doi:10.1002/jcsm.12213), 2017-07-19
Supplement: JCSM-8-713-s001.pdf [file JCSM-8-713-s001.pdf]

## Online Supplemental Material

Development of a bedside viable ultrasound protocol to quantify appendicular lean tissue mass

Michael T. Paris<sup>1</sup>, Benoit Lafleur<sup>1</sup>, Joel A. Dubin<sup>2,3</sup>, Marina Mourtzakis<sup>1</sup>

<sup>1</sup>Department of Kinesiology, University of Waterloo, Waterloo, ON, Canada

<sup>2</sup>School of Public Health and Health Systems, University of Waterloo, Waterloo, ON, Canada

<sup>3</sup>Department of Statistics and Actuarial Science, University of Waterloo, Waterloo, ON, Canada

## Table of Contents

|                                                                                                                                                                                       |   |
|---------------------------------------------------------------------------------------------------------------------------------------------------------------------------------------|---|
| <b>Supplemental Table 1.</b> Linear regression analysis to predict appendicular lean tissue using the 9-site protocol.....                                                            | 3 |
| <b>Supplemental Figure 1.</b> Participant flow chart.....                                                                                                                             | 4 |
| <b>Supplemental Figure 2.</b> Comparison between minimal (A) and maximal compression (B) protocols within a single participant.....                                                   | 5 |
| <b>Supplemental Figure 3.</b> Bland-Altman plot comparing DXA derived and the 9-site protocol predicted appendicular lean tissue mass, utilizing all participants from all folds..... | 6 |
| <b>Supplemental Figure 4.</b> Bland-Altman plots for intra-rater reliability using the 4-site protocol for minimal compression.....                                                   | 7 |
| <b>Supplemental Figure 5.</b> Bland-Altman plots for intra-rater reliability using the 4-site protocol for maximal compression.....                                                   | 8 |

**Supplemental Table 1.** Linear regression analysis to predict appendicular lean tissue using the 9-site protocol

| Model       | Appendicular lean tissue      | Validation | Adjusted       | SEE  | p-value |
|-------------|-------------------------------|------------|----------------|------|---------|
| development | prediction (kg)               | fold       | R <sup>2</sup> | (kg) | model   |
| Folds 1+2   | -4.320+(0.563X <sub>5</sub> ) | 3          | 0.92           | 1.53 | <0.001  |
| Folds 1+3   | -4.671+(0.569X <sub>5</sub> ) | 2          | 0.90           | 1.76 | <0.001  |
| Folds 2+3   | -5.155+(0.581X <sub>5</sub> ) | 1          | 0.89           | 1.89 | <0.001  |
| Average     | -4.715+(0.571X <sub>5</sub> ) | -          | 0.90           | 1.73 | -       |

X<sub>5</sub> = 9 site muscle thickness (sum of 9 sites) x height (cm x m). SEE, standard error of the estimate.

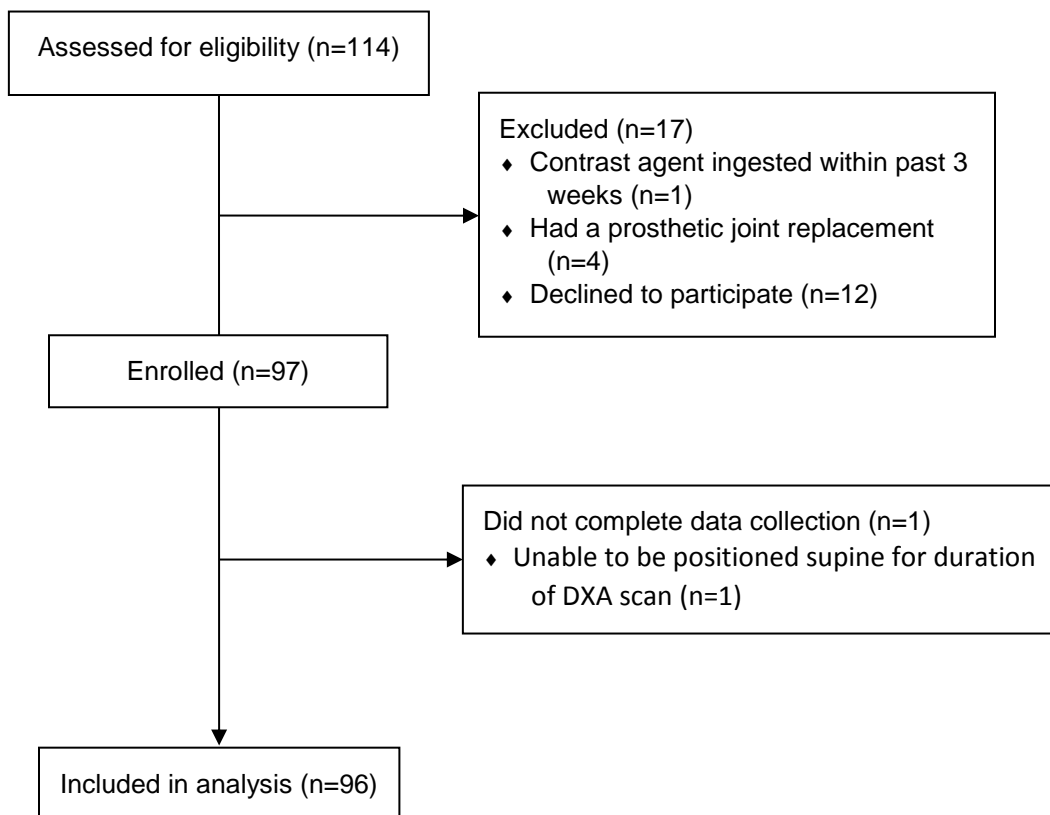

**Supplemental Figure 1.** Participant flow chart.

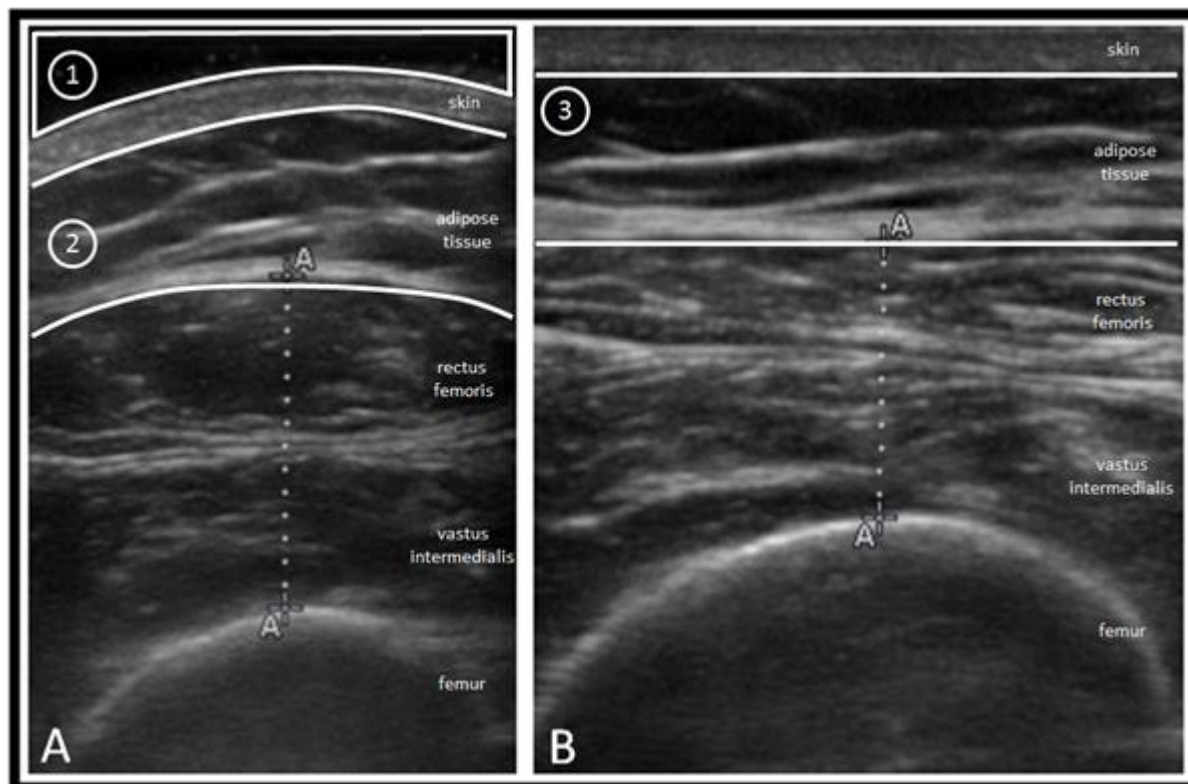

**Supplemental Figure 2.** Comparison between minimal (A) and maximal compression (B) protocols within a single participant. 1 – Region highlighting ample acoustic coupling gel to ensure no contact occurs between skin and ultrasound probe. 2 – Highlighting convex nature of the skin and muscle belly, required for minimal compression. 3 – Skin and muscle belly loose convex shape during maximal compression.

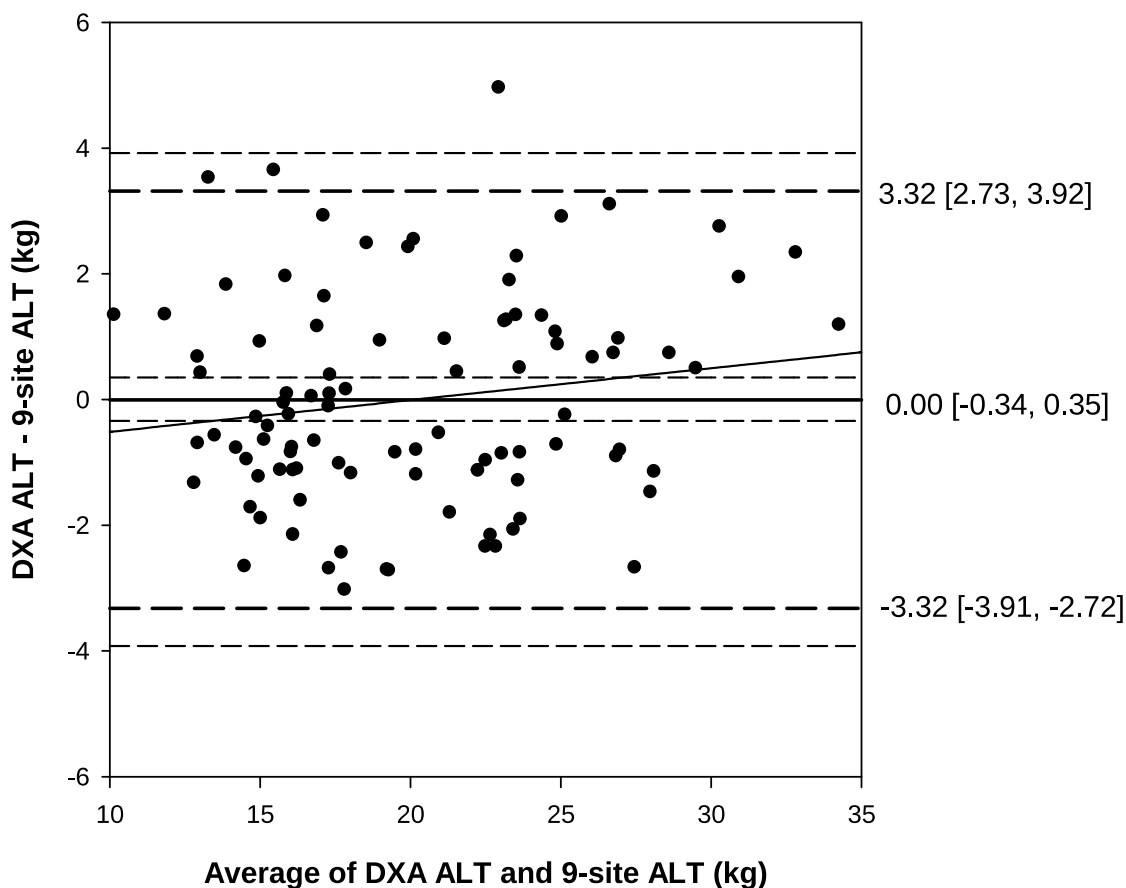

**Supplemental Figure 3.** Bland-Altman plot comparing DXA derived and the 9-site protocol predicted appendicular lean tissue mass, utilizing all participants from all folds. No fixed (0.00 [-0.34, 0.35]) or proportional bias was present (solid black line, 95% CI – inner short dashed line), with limits of agreement (1.96 SD) of -3.32 and 3.32 (middle long dashed lines) and tolerance limits of -3.91 and 3.92 (outer short dashed lines). ALT, appendicular lean tissue mass; CI, confidence interval; DXA, dual-energy x-ray absorptiometry; SD, standard deviation

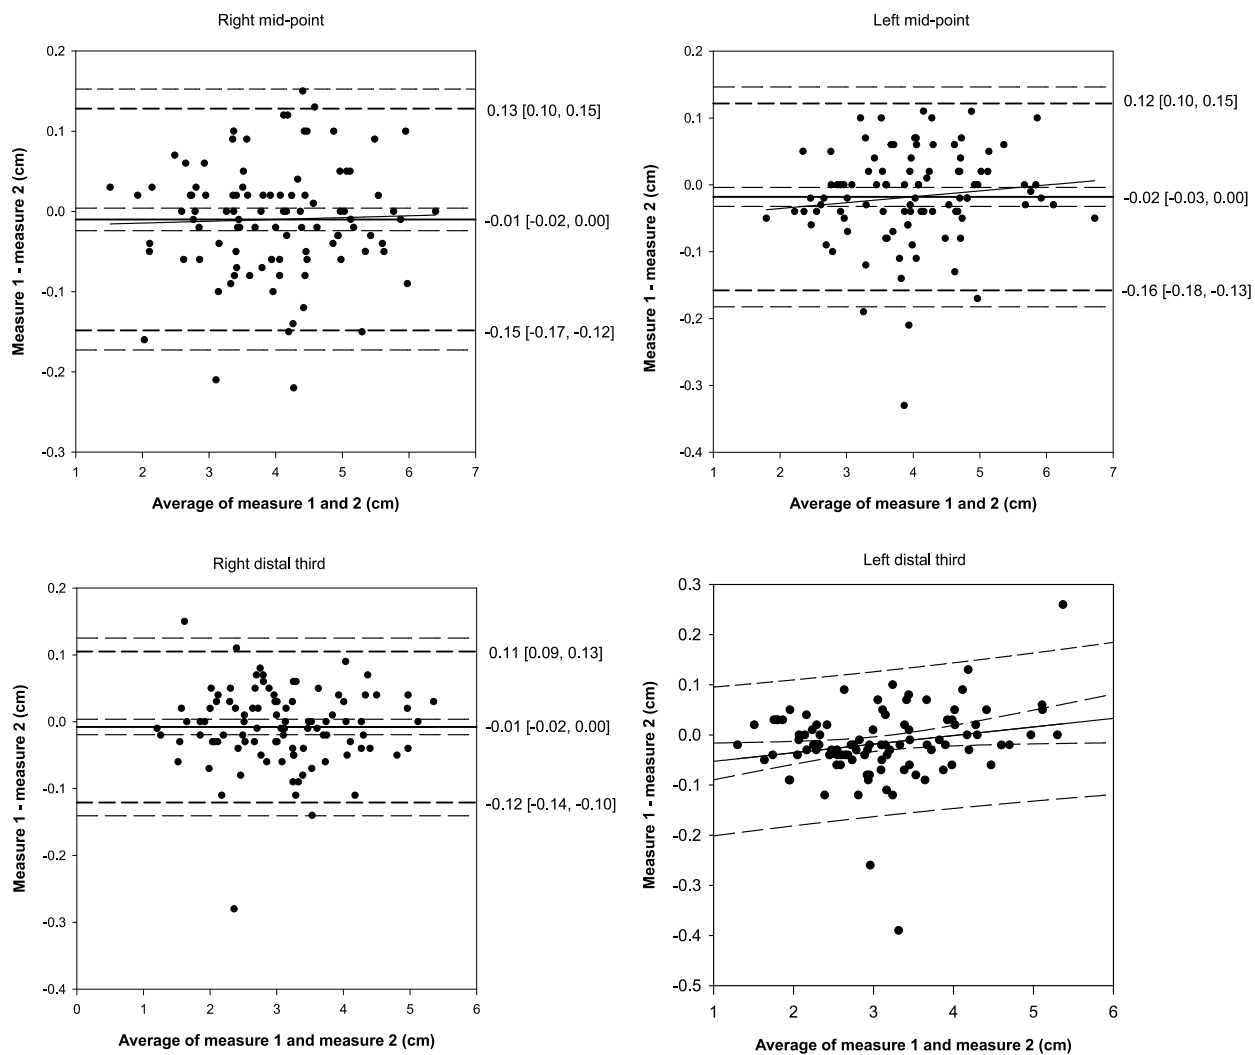

**Supplemental Figure 4.** Bland-Altman plots for intra-rater reliability using the 4-site protocol for minimal compression. Minimal compression average bias [95% CI] for all intra-rater plots (except plot with proportional bias) was -0.04 [-0.03, 0.01] with average limits of agreement and tolerance limits were -0.14 and 0.12 and -0.16 and 0.14. CI, confidence interval

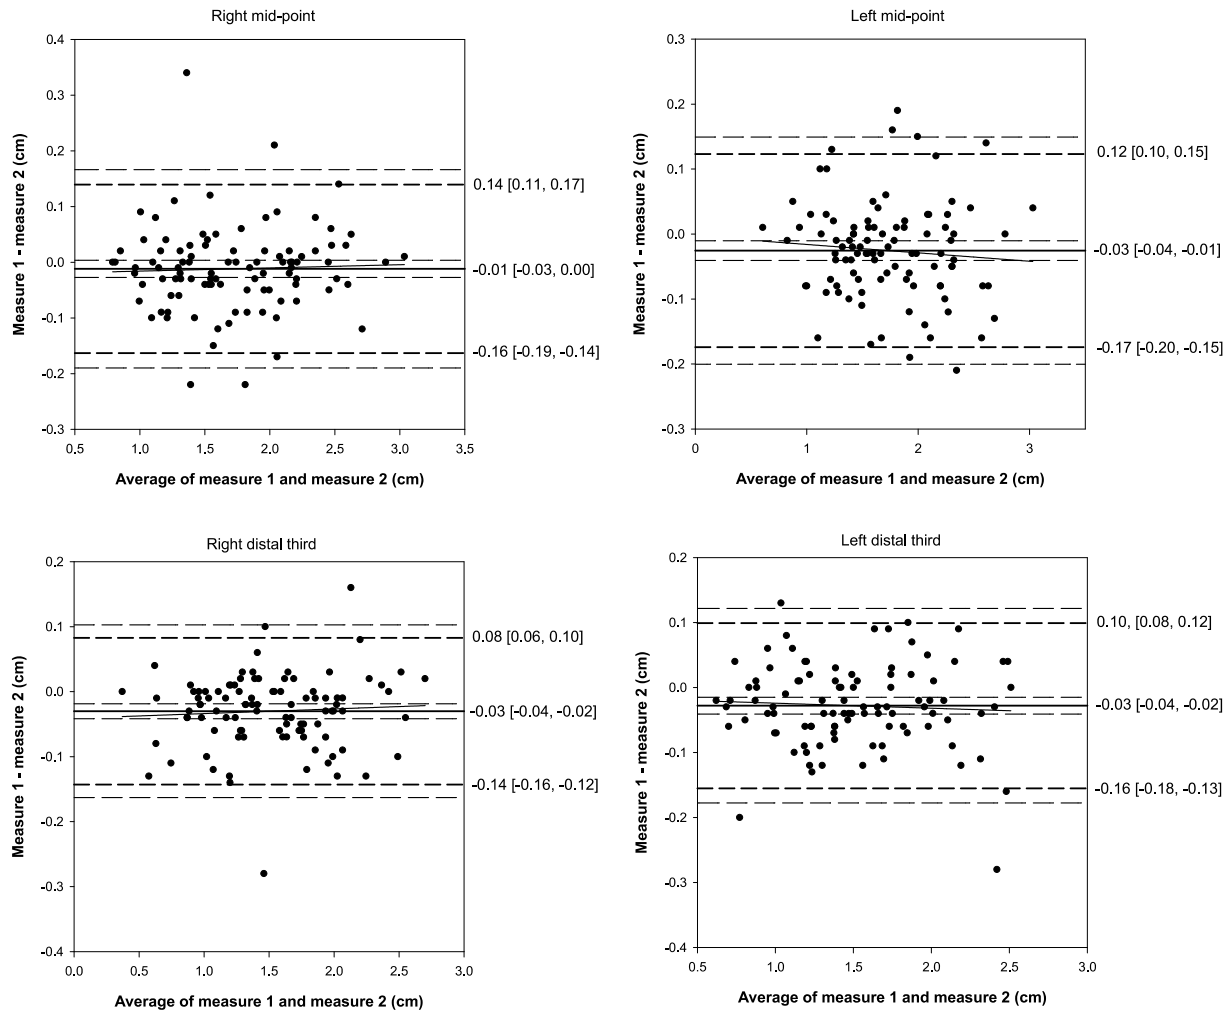

**Supplemental Figure 5.** Bland-Altman plots for intra-rater reliability using the 4-site protocol for maximal compression. Maximal compression presented a significant fixed bias [95% CI] of -0.02 [-0.04, -0.01] with average limits of agreement and tolerance limits were -0.14 and 0.12 and -0.16 and 0.14 and for maximal compression, -0.16 and 0.11 and -0.18 and 0.14. CI, confidence interval
